# Supplementary material for: Common molecular mechanisms underlie the transfer of alpha-synuclein, Tau and huntingtin and modulate spontaneous activity in neuronal cells
Source: bioRxiv or medRxiv preprint supplement (doi:10.1101/2021.07.18.452825), 2021-07-19
Supplement: Supplementary file [file media-1.pdf]

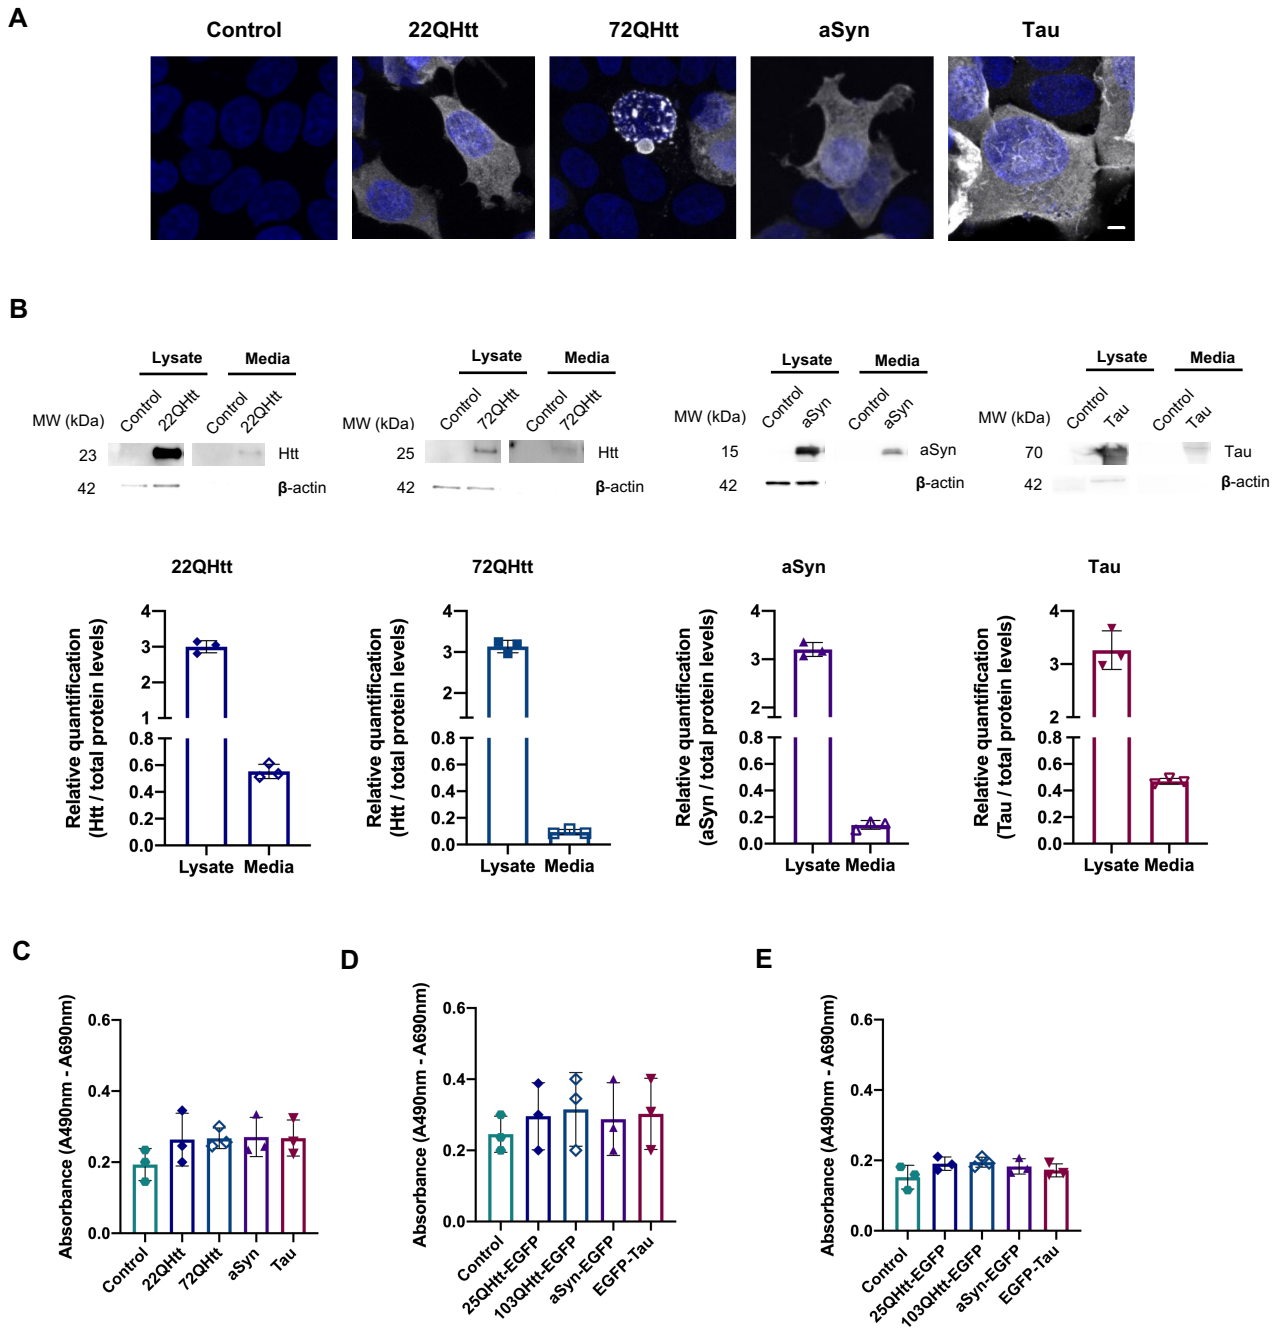

Supplementary Figure 1. Different disease-related proteins are secreted to the extracellular space.

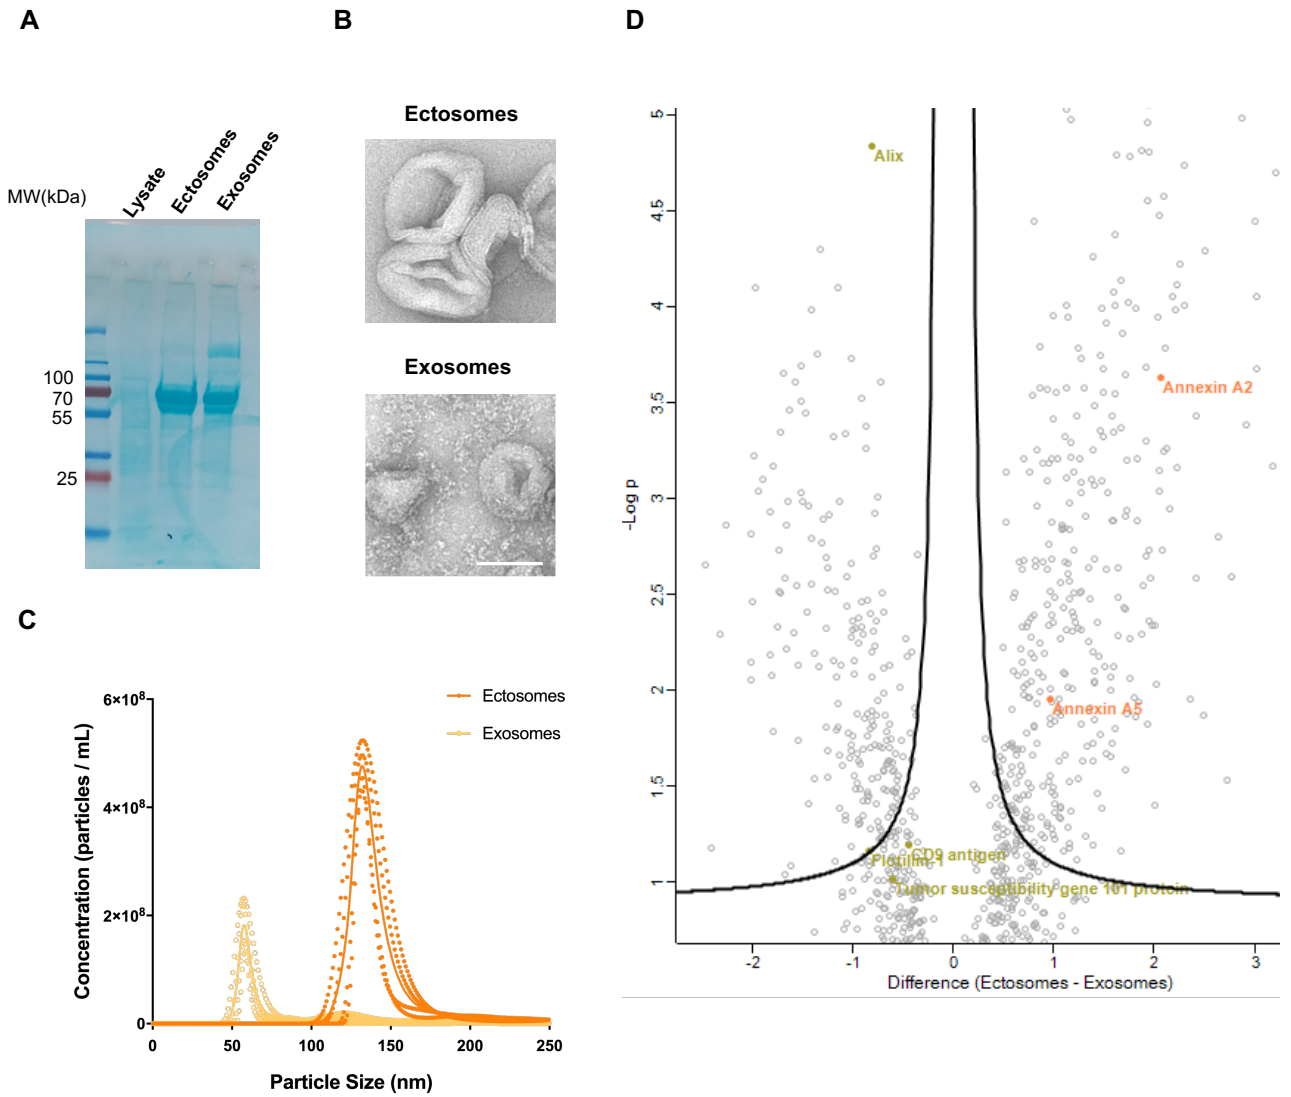

**Supplementary Figure 2. Purification and characterization of secreted EVs using differential centrifugation.**

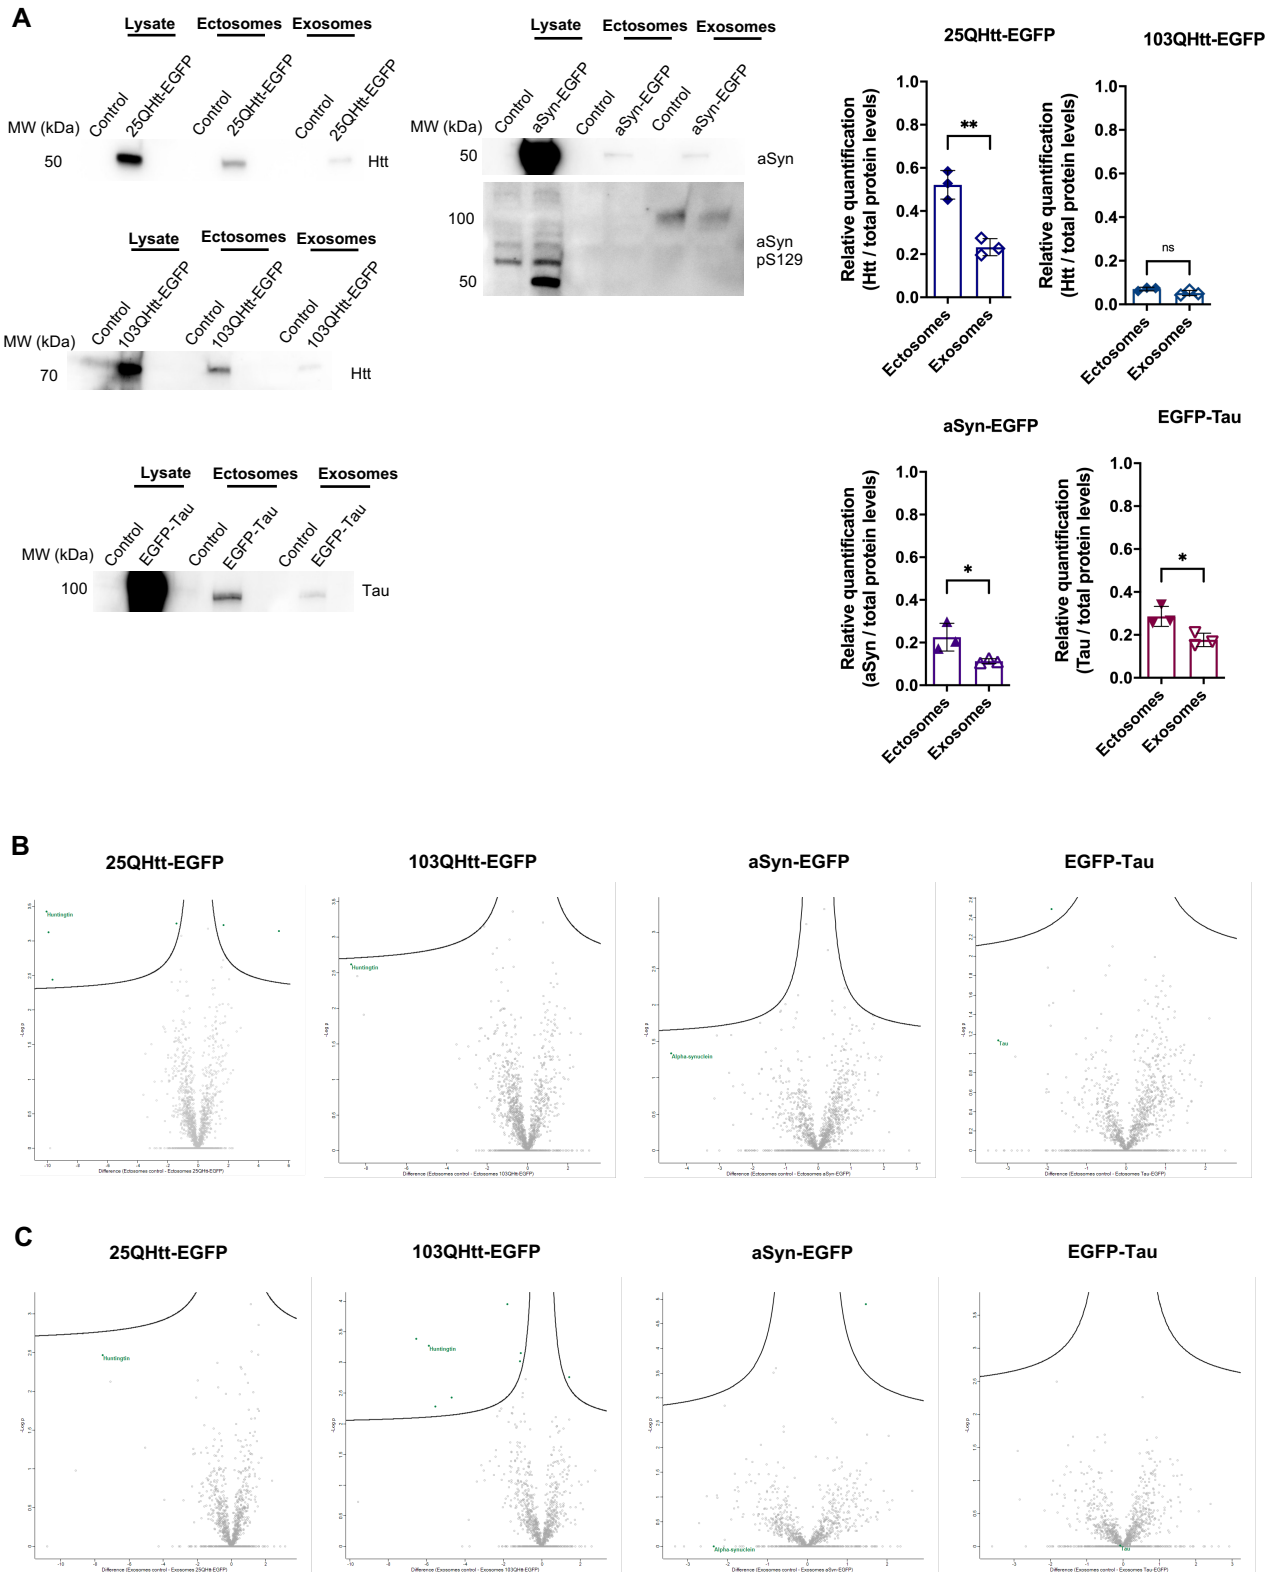

**Supplementary Figure 3. Disease-related proteins are more enriched in ectosomes.**

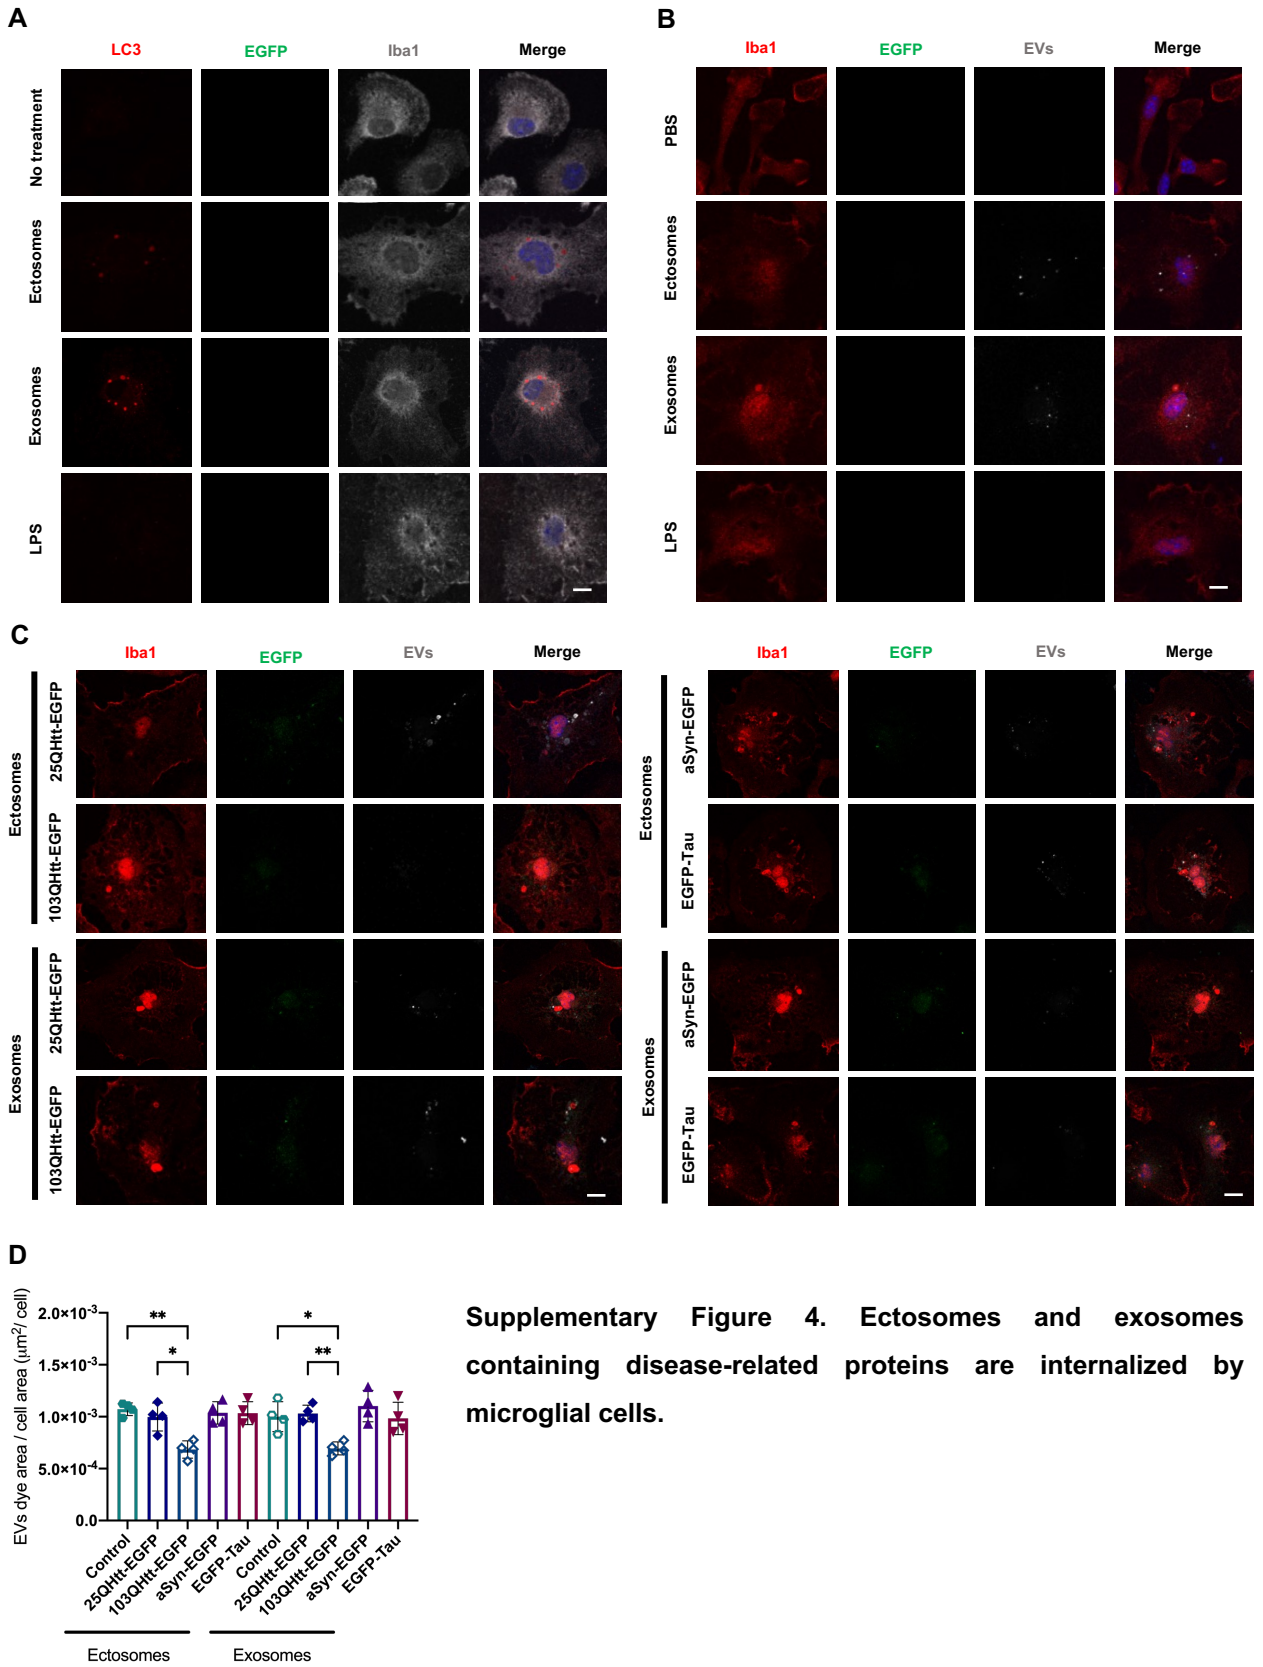

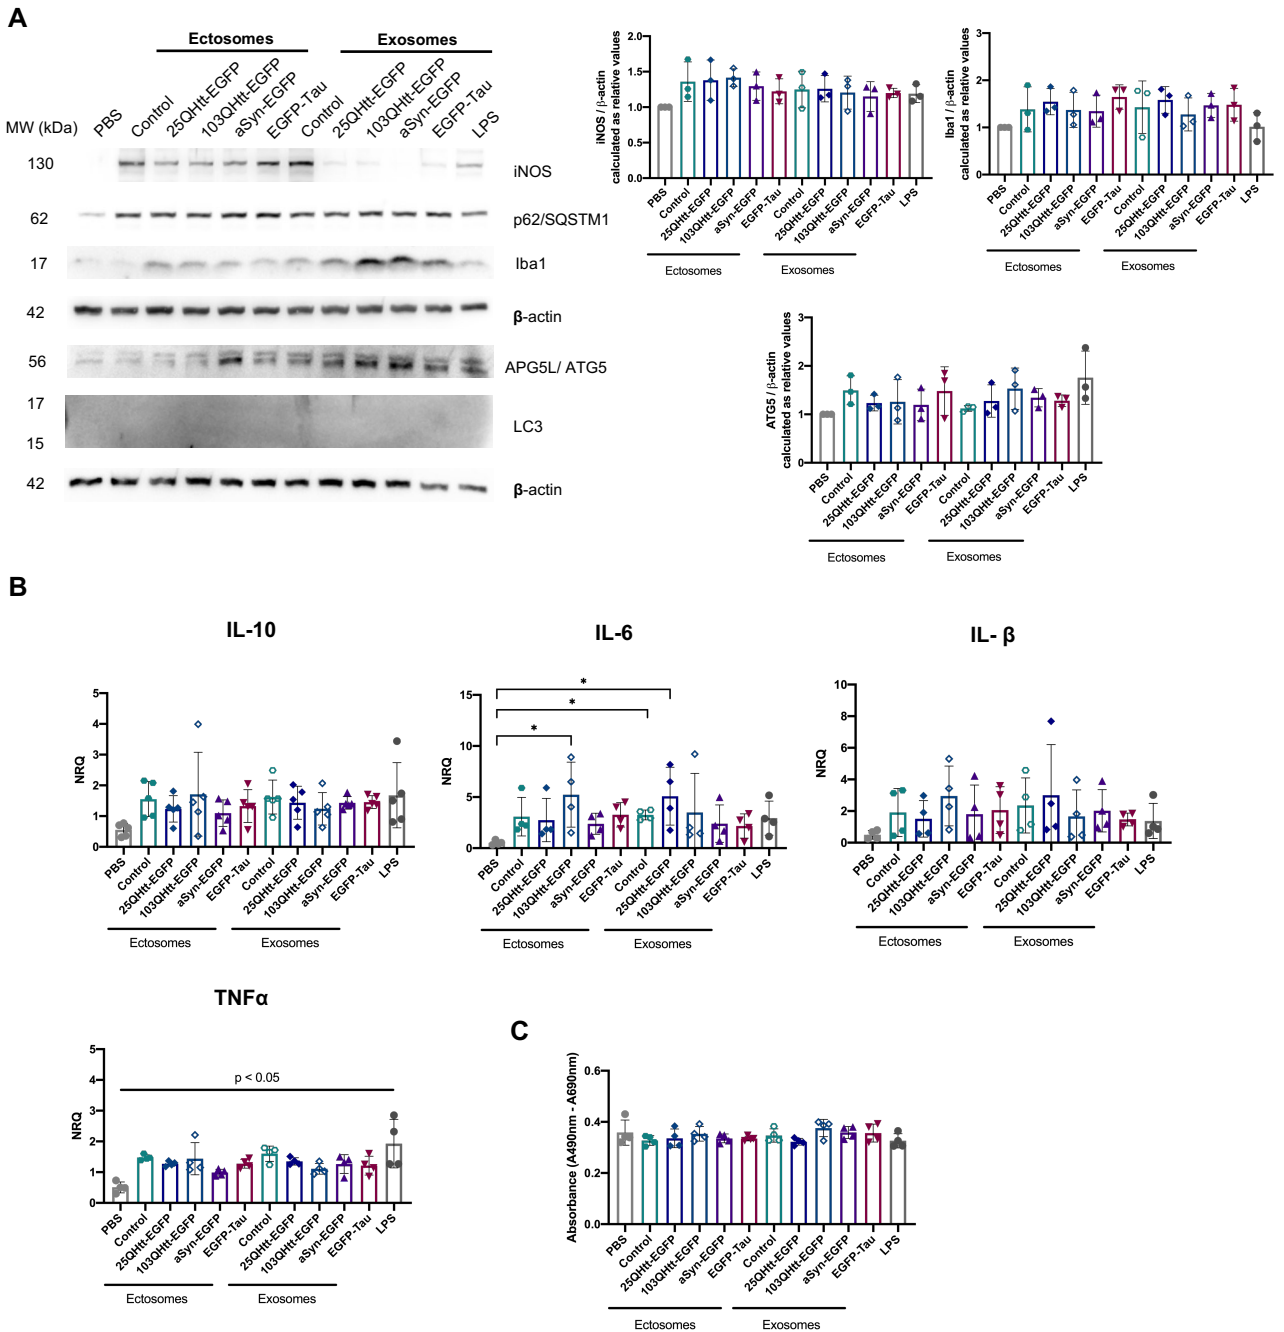

**Supplementary Figure 5. Ectosomes and exosomes containing disease-related proteins are internalized by microglial cells.**

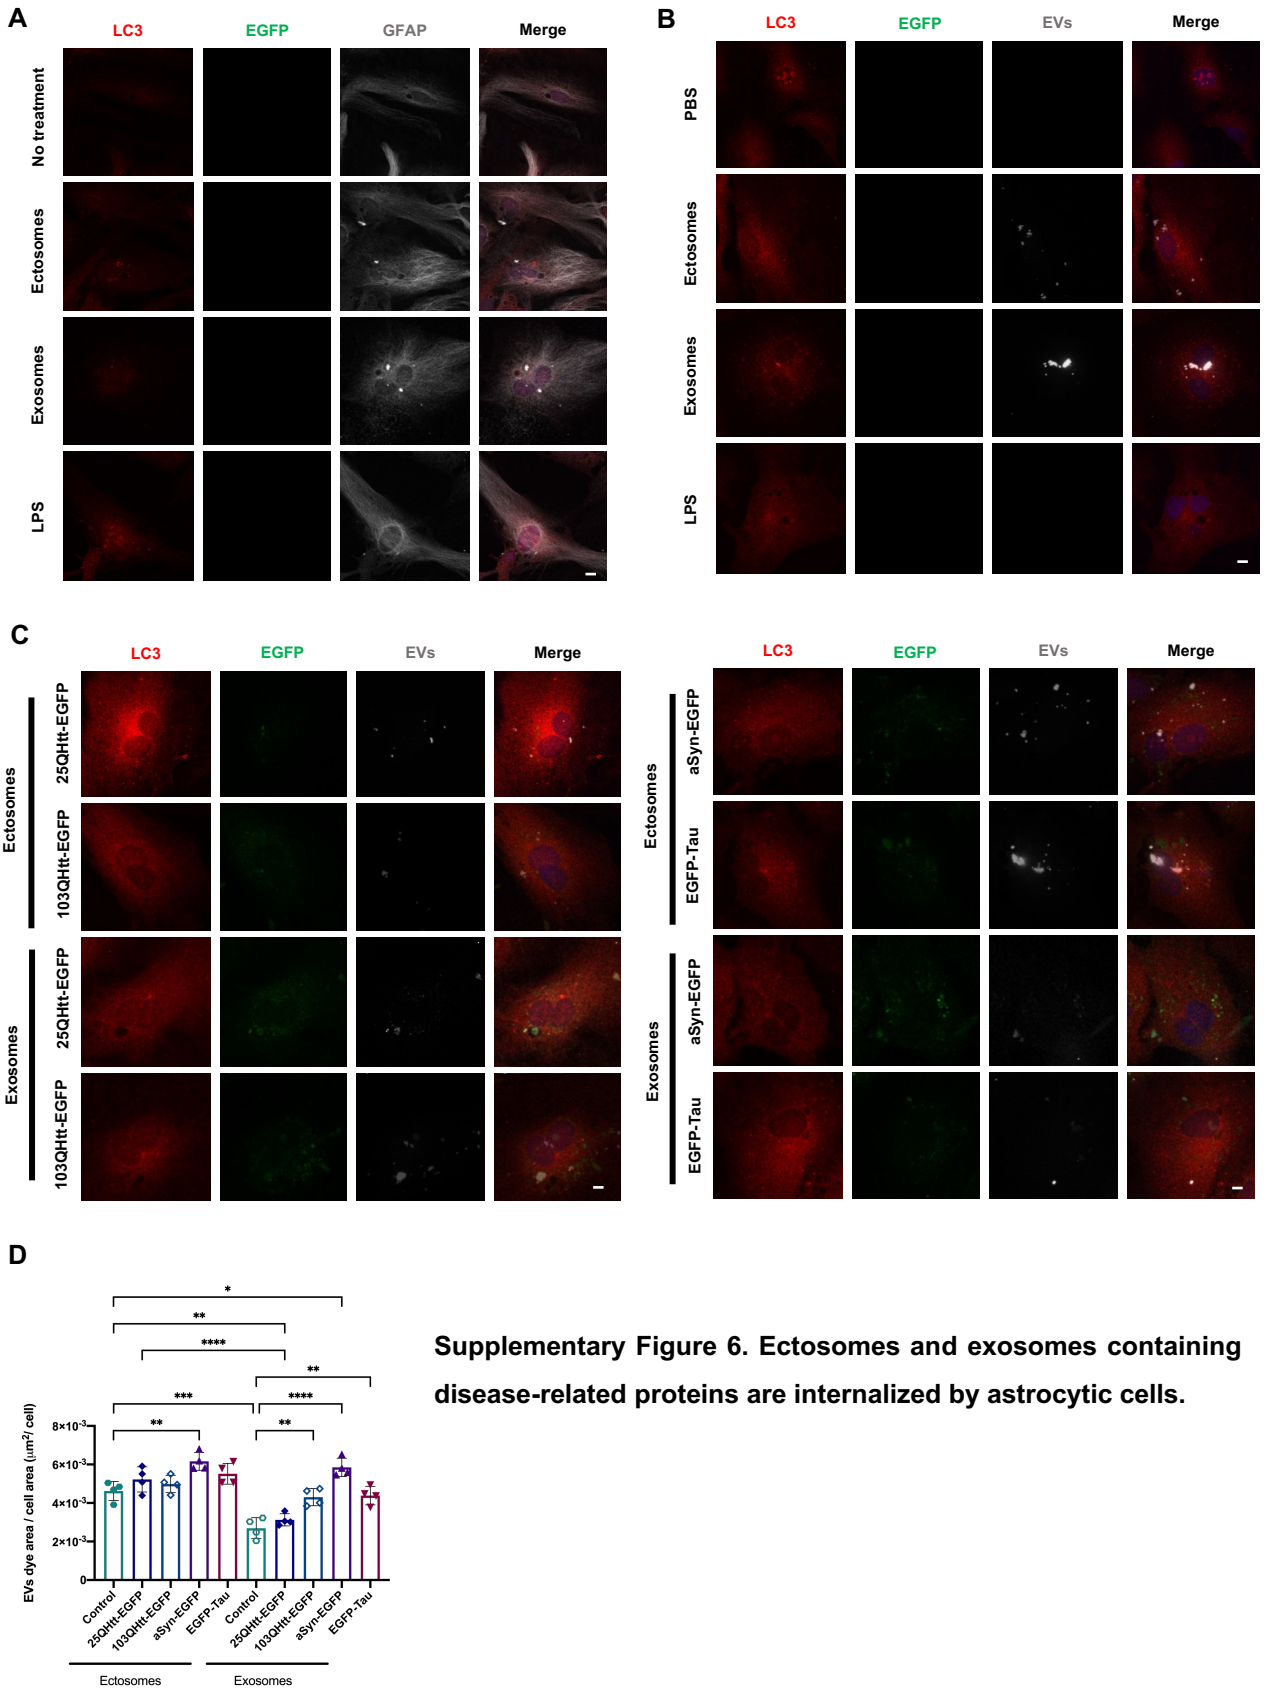

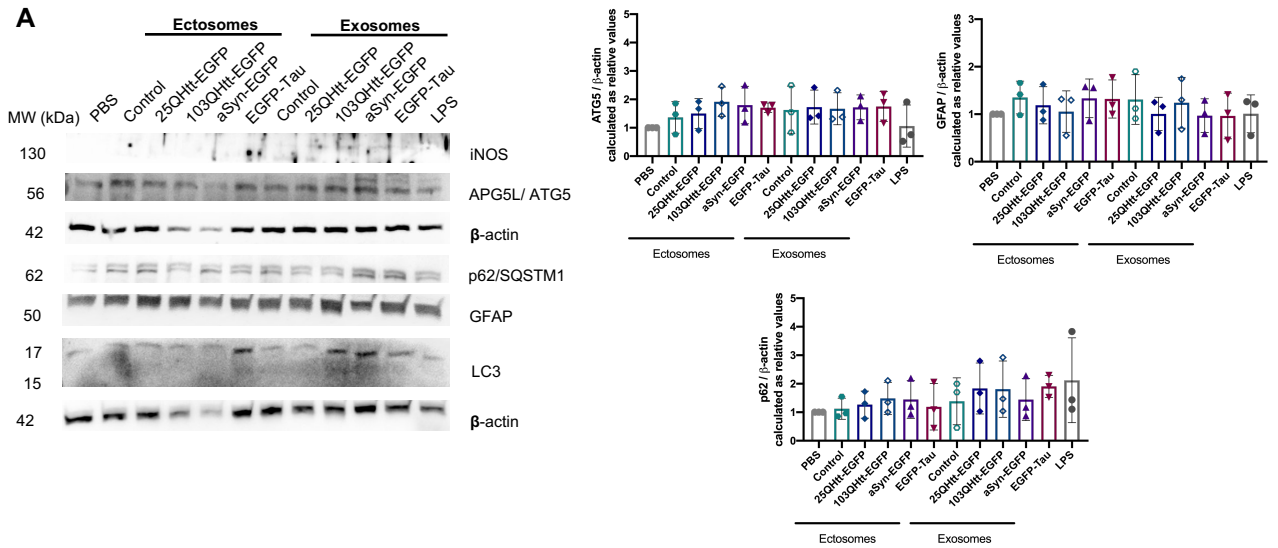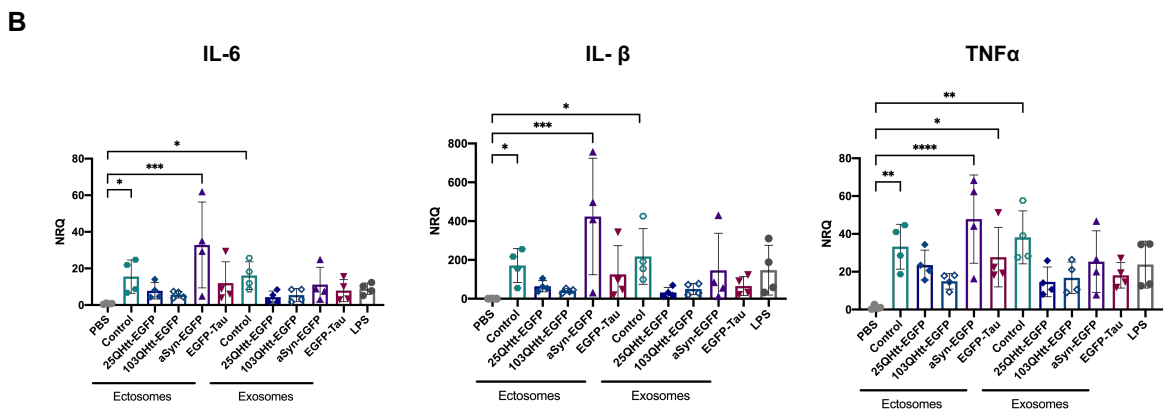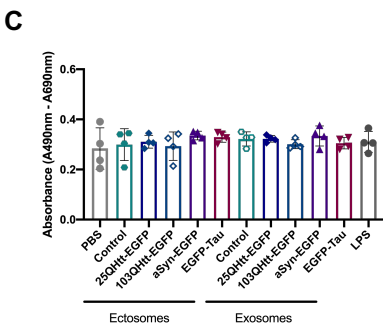

**Supplementary Figure 7. Ectosomes and exosomes containing disease-related proteins are internalized by astrocytic cells.**

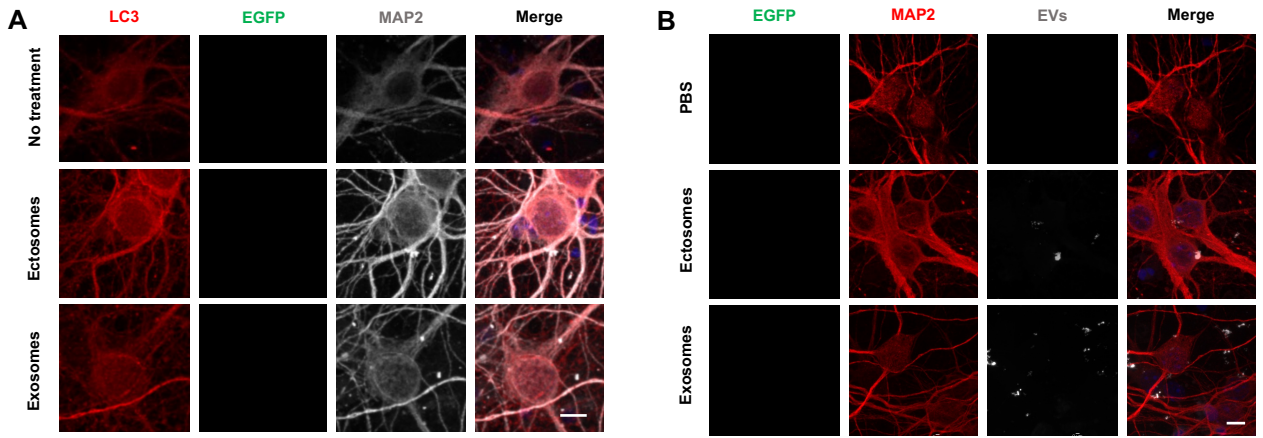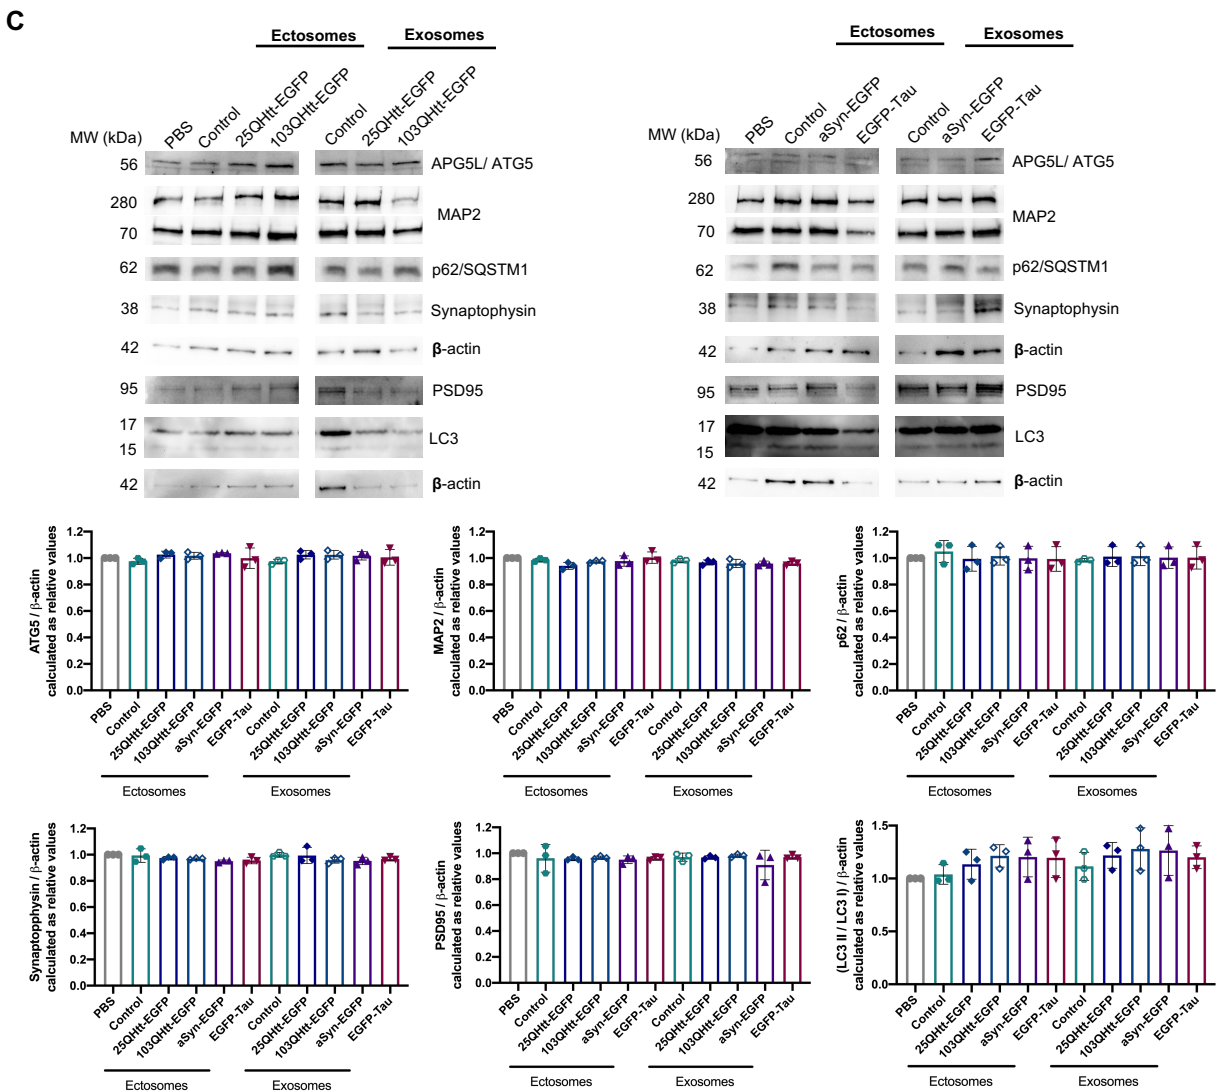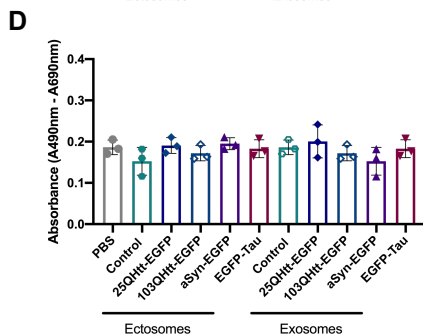

**Supplementary Figure 8. Ectosomes and exosomes containing disease-related proteins are internalized by cortical neurons.**
